# Supplementary material for: The Prognostic Value of Neutrophil-to-Lymphocyte Ratio in Metastatic Testicular Cancer
Source: MDPI journal article supplement (doi:10.3390/curroncol28010014), 2020-12-21
Supplement: s1 [file s1]

## Supplementary material

**Table S1.** Determination of optimal cut-off of NLR for PFS according to discriminatory accuracy evaluated by determining the area under the receiver operating characteristic curve (AUROC). .

| NLR cut-off | AUROC | 95% CI      | P value |
|-------------|-------|-------------|---------|
| 2           | 0.58  | 0.52 - 0.65 | 0.01    |
| 3           | 0.57  | 0.50 - 0.64 | 0.04    |
| 4           | 0.55  | 0.48 - 0.62 | 0.12    |
| 5           | 0.53  | 0.46 - 0.60 | 0.42    |
| 6           | 0.52  | 0.45 - 0.59 | 0.62    |
| 7           | 0.51  | 0.44 - 0.58 | 0.74    |

**Table S2.** Determination of optimal cut-off of NLR for OS according to discriminatory accuracy evaluated by determining the area under the receiver operating characteristic curve (AUROC). .

| NLR cut-off | AUROC | 95% CI      | P value |
|-------------|-------|-------------|---------|
| 2           | 0.58  | 0.50 - 0.66 | 0.05    |
| 3           | 0.62  | 0.53 - 0.70 | <0.01   |
| 4           | 0.57  | 0.49 - 0.66 | 0.06    |
| 5           | 0.55  | 0.47 - 0.63 | 0.21    |
| 6           | 0.54  | 0.46 - 0.62 | 0.30    |
| 7           | 0.53  | 0.45 - 0.61 | 0.45    |
